# Supplementary material
Source: PubMed Central journal article supplement (PMC3205989)
Supplement: NIHMS291803-supplement-Errata.pdf [file NIHMS291803-supplement-Errata.pdf]

## Corrigendum: Interactions among the transcription factors Runx1, ROR $\gamma$ t and Foxp3 regulate the differentiation of interleukin 17–producing T cells

Fuping Zhang, Guangxun Meng & Warren Strober

*Nat. Immunol.* 9, 1297–1306 (2008); published online 12 October 2008; corrected after print 14 November 2008

In the version of this article initially published, two panels in Figure 9a were horizontally inverted. The error has been corrected in the HTML and PDF versions of the article.

## Corrigendum: Enhanced Toll-like receptor responses in the absence of signaling adaptor DAP12

Jessica A Hamerman, Nadia K Tchao, Clifford A Lowell & Lewis L Lanier

*Nat. Immunol.* 6, 579–586 (2005); published online 15 May 2005; corrected after print 16 January 2009

In the version of this article initially published, the dose of D-galactosamine for the endotoxic shock experiments described in the Methods section (20  $\mu$ g) was incorrect. The correct dose is 20 mg. The error has been corrected in the HTML and PDF versions of the article.

## Erratum: Calcium signaling in immune cells

Monika Vig & Jean-Pierre Kinet

*Nat. Immunol.* 10, 21–27 (2009); published online 17 December 2008; corrected after print 16 January 2009

In the version of this article initially published, the published online date is 17 January 2009 and the ovals indicating store-dependent channels in the bottom row of Figure 2 are blue. The published online date should be 17 December 2008 and the ovals should be black. The errors have been corrected in the HTML and PDF versions of the article.

## Erratum: The Duffy antigen receptor for chemokines transports chemokines and supports their promigratory activity

Monika Pruenster, Liesbeth Mudde, Paula Bombosi, Svetla Dimitrova, Marion Zsak, Jim Middleton, Ann Richmond, Gerard J Graham, Stephan Segerer, Robert J B Nibbs & Antal Rot

*Nat. Immunol.* 10, 101–108 (2009); published online 7 December 2008; corrected after print 16 January 2009

In the version of this article initially published, the images in Figure 2c,e were truncated. Intact images have replaced those versions. The error has been corrected in the HTML and PDF versions of the article.

## Erratum: Cortical sinus probing, S1P1-dependent entry and flow-based capture of egressing T cells

Irina L Grigorova, Susan R Schwab, Tri Giang Phan, Trung H M Pham, Takaharu Okada & Jason G Cyster

*Nat. Immunol.* 10, 58–65 (2009); published online 7 December 2008; corrected after print 16 January 2009

In the version of this article initially published, the vessel label 'Afferent' beneath the lymph node in Figure 1c is incorrect. The correct label is 'Efferent'. The error has been corrected in the HTML and PDF versions of the article.
